# Supplementary material for: Trends in Utilization of Outpatient Respiratory Syncytial Virus Prophylaxis with Palivizumab among Medicaid- and Commercially Insured Infants
Source: Springer Nature journal article supplement (doi:10.1007/s40121-017-0178-6), 2017-11-17
Supplement: MOESM1 [file 15233706]

**Supplemental Table 1. Codes Used to Define Risk Cohorts**

| <b>Code Type</b>      | <b>Code</b> |
|-----------------------|-------------|
| DRG                   | 385         |
| DRG                   | 386         |
| DRG                   | 387         |
| DRG                   | 388         |
| DRG                   | 389         |
| DRG                   | 390         |
| DRG                   | 391         |
| DRG                   | 789         |
| DRG                   | 790         |
| DRG                   | 791         |
| DRG                   | 792         |
| DRG                   | 793         |
| DRG                   | 794         |
| DRG                   | 795         |
| ICD-9-CM<br>Diagnosis | V30.xx      |
| ICD-9-CM<br>Diagnosis | V27.0x      |
| ICD-9-CM<br>Diagnosis | V31.xx      |
| ICD-9-CM<br>Diagnosis | V32.xx      |
| ICD-9-CM<br>Diagnosis | V33.xx      |
| ICD-9-CM<br>Diagnosis | V34.xx      |
| ICD-9-CM<br>Diagnosis | V35.xx      |
| ICD-9-CM<br>Diagnosis | V36.xx      |
| ICD-9-CM<br>Diagnosis | V37.xx      |
| ICD-9-CM<br>Diagnosis | V38.xx      |
| ICD-9-CM<br>Diagnosis | V27.2       |
| ICD-9-CM<br>Diagnosis | V27.3       |
| ICD-9-CM<br>Diagnosis | V27.5       |
| ICD-9-CM              | V27.6       |

|                       |             |
|-----------------------|-------------|
| Diagnosis             |             |
| ICD-9-CM<br>Diagnosis | V27.9x      |
| HCPCS                 | S9562       |
| HCPCS                 | C9003       |
| HCPCS                 | J1565       |
| CPT4                  | 90378       |
| CPT5                  | 90379       |
| NDC                   | 54569549100 |
| NDC                   | 54569549200 |
| NDC                   | 60574411101 |
| NDC                   | 60574411201 |
| NDC                   | 60574411301 |
| NDC                   | 60574411401 |
| CPT                   | 00796       |
| CPT                   | 32851       |
| CPT                   | 32852       |
| CPT                   | 32853       |
| CPT                   | 32854       |
| CPT                   | 33935       |
| CPT                   | 33945       |
| CPT                   | 44135       |
| CPT                   | 44136       |
| CPT                   | 50360       |
| CPT                   | 50365       |
| ICD-9 Procedure       | 33.5x       |
| ICD-9 Procedure       | 33.6x       |
| ICD-9 Procedure       | 37.51       |
| ICD-9 Procedure       | 41.0x       |
| ICD-9 Procedure       | 41.94       |
| ICD-9 Procedure       | 46.97       |
| ICD-9 Procedure       | 50.5x       |
| ICD-9 Procedure       | 52.8x       |
| ICD-9 Procedure       | 55.6x       |
| ICD-9-CM<br>Diagnosis | 996.8x      |
| ICD-9-CM<br>Diagnosis | V42.xx      |
| ICD-9-CM<br>Diagnosis | 277.0x      |
| ICD-9-CM<br>Diagnosis | 279.x       |
| ICD-9-CM              | 748.4       |

|                       |        |
|-----------------------|--------|
| Diagnosis             |        |
| ICD-9-CM<br>Diagnosis | 748.5  |
| ICD-9-CM<br>Diagnosis | 748.6x |
| ICD-9-CM<br>Diagnosis | 748.8  |
| ICD-9-CM<br>Diagnosis | 748.9  |
| ICD-9-CM<br>Diagnosis | 330.2  |
| ICD-9-CM<br>Diagnosis | 335.0  |
| ICD-9-CM<br>Diagnosis | 335.1  |
| ICD-9-CM<br>Diagnosis | 335.10 |
| ICD-9-CM<br>Diagnosis | 335.11 |
| ICD-9-CM<br>Diagnosis | 335.2  |
| ICD-9-CM<br>Diagnosis | 343.x  |
| ICD-9-CM<br>Diagnosis | 356.x  |
| ICD-9-CM<br>Diagnosis | 358.1  |
| ICD-9-CM<br>Diagnosis | 359.0  |
| ICD-9-CM<br>Diagnosis | 359.1  |
| ICD-9-CM<br>Diagnosis | 359.21 |
| ICD-9-CM<br>Diagnosis | 359.22 |
| ICD-9-CM<br>Diagnosis | 359.23 |
| ICD-9-CM<br>Diagnosis | 359.9  |
| ICD-9-CM<br>Diagnosis | 710.3  |
| ICD-9-CM<br>Diagnosis | 740.0  |

|                       |        |
|-----------------------|--------|
| ICD-9-CM<br>Diagnosis | 740.1  |
| ICD-9-CM<br>Diagnosis | 740.2  |
| ICD-9-CM<br>Diagnosis | 741.0x |
| ICD-9-CM<br>Diagnosis | 741.9x |
| ICD-9-CM<br>Diagnosis | 742.x  |
| ICD-9-CM<br>Diagnosis | 754.2  |
| ICD-9-CM<br>Diagnosis | 756.1x |
| ICD-9-CM<br>Diagnosis | 756.6  |
| ICD-9-CM<br>Diagnosis | 758.1x |
| ICD-9-CM<br>Diagnosis | 745.0  |
| ICD-9-CM<br>Diagnosis | 745.2  |
| ICD-9-CM<br>Diagnosis | 745.3  |
| ICD-9-CM<br>Diagnosis | 745.4  |
| ICD-9-CM<br>Diagnosis | 745.5  |
| ICD-9-CM<br>Diagnosis | 745.7  |
| ICD-9-CM<br>Diagnosis | 745.8  |
| ICD-9-CM<br>Diagnosis | 745.9  |
| ICD-9-CM<br>Diagnosis | 746.1  |
| ICD-9-CM<br>Diagnosis | 746.2  |
| ICD-9-CM<br>Diagnosis | 746.3  |
| ICD-9-CM<br>Diagnosis | 746.4  |
| ICD-9-CM              | 745.10 |

|                       |        |
|-----------------------|--------|
| Diagnosis             |        |
| ICD-9-CM<br>Diagnosis | 745.11 |
| ICD-9-CM<br>Diagnosis | 745.12 |
| ICD-9-CM<br>Diagnosis | 745.19 |
| ICD-9-CM<br>Diagnosis | 745.60 |
| ICD-9-CM<br>Diagnosis | 745.61 |
| ICD-9-CM<br>Diagnosis | 745.69 |
| ICD-9-CM<br>Diagnosis | 746.00 |
| ICD-9-CM<br>Diagnosis | 746.01 |
| ICD-9-CM<br>Diagnosis | 746.02 |
| ICD-9-CM<br>Diagnosis | 746.09 |
| ICD-9-CM<br>Diagnosis | 746.5  |
| ICD-9-CM<br>Diagnosis | 746.6  |
| ICD-9-CM<br>Diagnosis | 746.7  |
| ICD-9-CM<br>Diagnosis | 746.9  |
| ICD-9-CM<br>Diagnosis | 747.0  |
| ICD-9-CM<br>Diagnosis | 747.3  |
| ICD-9-CM<br>Diagnosis | 746.81 |
| ICD-9-CM<br>Diagnosis | 746.82 |
| ICD-9-CM<br>Diagnosis | 746.83 |
| ICD-9-CM<br>Diagnosis | 746.84 |
| ICD-9-CM<br>Diagnosis | 746.85 |

|                       |        |
|-----------------------|--------|
| ICD-9-CM<br>Diagnosis | 746.87 |
| ICD-9-CM<br>Diagnosis | 746.89 |
| ICD-9-CM<br>Diagnosis | 747.10 |
| ICD-9-CM<br>Diagnosis | 747.11 |
| ICD-9-CM<br>Diagnosis | 747.20 |
| ICD-9-CM<br>Diagnosis | 747.21 |
| ICD-9-CM<br>Diagnosis | 747.22 |
| ICD-9-CM<br>Diagnosis | 747.29 |
| ICD-9-CM<br>Diagnosis | 747.40 |
| ICD-9-CM<br>Diagnosis | 747.41 |
| ICD-9-CM<br>Diagnosis | 747.42 |
| ICD-9-CM<br>Diagnosis | 747.49 |
| ICD-9 Procedure       | 38.85  |
| ICD-9 Procedure       | 38.84  |
| ICD-9 Procedure       | 39.59  |
| ICD-9 Procedure       | 37.21  |
| ICD-9 Procedure       | 37.22  |
| ICD-9 Procedure       | 37.23  |
| ICD-9 Procedure       | 88.42  |
| ICD-9 Procedure       | 88.43  |
| ICD-9 Procedure       | 88.44  |
| ICD-9 Procedure       | 88.50  |
| ICD-9 Procedure       | 88.51  |
| ICD-9 Procedure       | 88.52  |
| ICD-9 Procedure       | 88.53  |
| ICD-9 Procedure       | 88.54  |
| ICD-9 Procedure       | 88.55  |
| ICD-9 Procedure       | 88.56  |
| ICD-9 Procedure       | 88.57  |
| ICD-9 Procedure       | 88.58  |
| ICD-9 Procedure       | 39.0   |

|                 |       |
|-----------------|-------|
| ICD-9 Procedure | 35.00 |
| ICD-9 Procedure | 35.01 |
| ICD-9 Procedure | 35.02 |
| ICD-9 Procedure | 35.03 |
| ICD-9 Procedure | 35.04 |
| ICD-9 Procedure | 35.10 |
| ICD-9 Procedure | 35.11 |
| ICD-9 Procedure | 35.12 |
| ICD-9 Procedure | 35.13 |
| ICD-9 Procedure | 35.14 |
| ICD-9 Procedure | 35.20 |
| ICD-9 Procedure | 35.21 |
| ICD-9 Procedure | 35.22 |
| ICD-9 Procedure | 35.23 |
| ICD-9 Procedure | 35.24 |
| ICD-9 Procedure | 35.25 |
| ICD-9 Procedure | 35.26 |
| ICD-9 Procedure | 35.27 |
| ICD-9 Procedure | 35.28 |
| ICD-9 Procedure | 35.31 |
| ICD-9 Procedure | 35.32 |
| ICD-9 Procedure | 35.33 |
| ICD-9 Procedure | 35.34 |
| ICD-9 Procedure | 35.35 |
| ICD-9 Procedure | 35.39 |
| ICD-9 Procedure | 35.41 |
| ICD-9 Procedure | 35.42 |
| ICD-9 Procedure | 35.50 |
| ICD-9 Procedure | 35.51 |
| ICD-9 Procedure | 35.52 |
| ICD-9 Procedure | 35.53 |
| ICD-9 Procedure | 35.54 |
| ICD-9 Procedure | 35.60 |
| ICD-9 Procedure | 35.61 |
| ICD-9 Procedure | 35.62 |
| ICD-9 Procedure | 35.63 |
| ICD-9 Procedure | 35.70 |
| ICD-9 Procedure | 35.71 |
| ICD-9 Procedure | 35.72 |
| ICD-9 Procedure | 35.73 |
| ICD-9 Procedure | 35.81 |
| ICD-9 Procedure | 35.82 |
| ICD-9 Procedure | 35.83 |

|                 |       |
|-----------------|-------|
| ICD-9 Procedure | 35.84 |
| ICD-9 Procedure | 35.91 |
| ICD-9 Procedure | 35.92 |
| ICD-9 Procedure | 35.93 |
| ICD-9 Procedure | 35.94 |
| ICD-9 Procedure | 35.95 |
| ICD-9 Procedure | 35.98 |
| ICD-9 Procedure | 35.99 |
| ICD-9 Procedure | 36.99 |
| ICD-9 Procedure | 37.33 |
| ICD-9 Procedure | 37.36 |
| ICD-9 Procedure | 37.51 |
| ICD-9 Procedure | 37.52 |
| ICD-9 Procedure | 39.21 |
| ICD-9 Procedure | 38.34 |
| ICD-9 Procedure | 38.35 |
| ICD-9 Procedure | 38.44 |
| ICD-9 Procedure | 38.45 |
| ICD-9 Procedure | 38.64 |
| ICD-9 Procedure | 38.65 |
| ICD-9 Procedure | 38.84 |
| ICD-9 Procedure | 38.85 |
| ICD-9 Procedure | 39.49 |
| ICD-9 Procedure | 39.56 |
| ICD-9 Procedure | 39.57 |
| ICD-9 Procedure | 39.58 |
| ICD-9 Procedure | 39.59 |
| ICD-9 Procedure | 35.00 |
| ICD-9 Procedure | 35.01 |
| ICD-9 Procedure | 35.02 |
| ICD-9 Procedure | 35.03 |
| ICD-9 Procedure | 35.04 |
| ICD-9 Procedure | 35.41 |
| ICD-9 Procedure | 35.42 |
| ICD-9 Procedure | 35.51 |
| ICD-9 Procedure | 35.71 |
| ICD-9 Procedure | 35.53 |
| ICD-9 Procedure | 35.72 |
| ICD-9 Procedure | 35.41 |
| ICD-9 Procedure | 35.52 |
| CPT             | 33400 |
| CPT             | 33403 |
| CPT             | 33405 |



|     |       |
|-----|-------|
| CPT | 33406 |
| CPT | 33412 |
| CPT | 33413 |
| CPT | 33414 |
| CPT | 33415 |
| CPT | 33416 |
| CPT | 33425 |
| CPT | 33427 |
| CPT | 33430 |
| CPT | 33463 |
| CPT | 33476 |
| CPT | 33478 |
| CPT | 33474 |
| CPT | 33475 |
| CPT | 33608 |
| CPT | 33611 |
| CPT | 33615 |
| CPT | 33617 |
| CPT | 33606 |
| CPT | 33619 |
| CPT | 33692 |
| CPT | 33694 |
| CPT | 33697 |
| CPT | 33730 |
| CPT | 33732 |
| CPT | 33770 |
| CPT | 33778 |
| CPT | 33780 |
| CPT | 33786 |
| CPT | 33788 |
| CPT | 33641 |
| CPT | 33645 |
| CPT | 33647 |
| CPT | 33660 |
| CPT | 33665 |
| CPT | 33670 |
| CPT | 33681 |
| CPT | 33736 |
| CPT | 33750 |
| CPT | 33767 |
| CPT | 33924 |
| CPT | 33802 |
| CPT | 33803 |

|                  |                                     |
|------------------|-------------------------------------|
| CPT              | 33820                               |
| CPT              | 33822                               |
| CPT              | 33840                               |
| CPT              | 33845                               |
| CPT              | 33852                               |
| CPT              | 33853                               |
| CPT              | 33917                               |
| CPT              | 33920                               |
| CPT              | 33690                               |
| CPT              | 33207                               |
| CPT              | 33208                               |
| CPT              | 33212                               |
| CPT              | 33213                               |
| CPT              | 33025                               |
| CPT              | 33530                               |
| HCPCS            | J1800                               |
| HCPCS            | S0171                               |
| HCPCS            | J1205                               |
| HCPCS            | J1730                               |
| HCPCS            | J1160                               |
| HCPCS            | J1162                               |
| HCPCS            | J1325                               |
| HCPCS            | K0455                               |
| HCPCS            | S0155                               |
| HCPCS            | S9347                               |
| HCPCS            | J1940                               |
| HCPCS            | J0360                               |
| HCPCS            | S0139                               |
| HCPCS            | J2440                               |
| HCPCS            | J2670                               |
| HCPCS            | J3265                               |
| HCPCS            | J3285                               |
| HCPCS            | Q2006                               |
| Medication Class | Beta blockers                       |
| Medication Class | Loop diuretics                      |
| Medication Class | K-sparing diuretics                 |
| Medication Class | Thiazide diuretics                  |
| Medication Class | Diuretic combinations               |
| Medication Class | ACE inhibitors                      |
| Medication Class | Angiotensin II receptor antagonists |
| Medication Class | Antihypertensive combinations       |
| Medication Class | Miscellaneous antihypertensives     |
| Medication Class | Miscellaneous cardiac agents        |

|                       |                                                 |
|-----------------------|-------------------------------------------------|
| ICD-9-CM<br>Diagnosis | 770.7                                           |
| Generic Names         | Albuterol                                       |
| Generic Names         | Amiloride hydrochloride                         |
| Generic Names         | Amiloride<br>hydrochloride/hydrochlorothiazide  |
| Generic Names         | Aminophylline                                   |
| Generic Names         | Arformoterol tartrate                           |
| Generic Names         | Atenolol/chlorthalidone                         |
| Generic Names         | Benazepril<br>hydrochloride/hydrochlorothiazide |
| Generic Names         | Bendroflumethiazide                             |
| Generic Names         | Bendroflumethiazide/nadolol                     |
| Generic Names         | Benzthiazide                                    |
| Generic Names         | Bisoprolol<br>fumarate/hydrochlorothiazide      |
| Generic Names         | Bitolterol mesylate                             |
| Generic Names         | Budesonide/formoterol fumarate                  |
| Generic Names         | Bumetanide                                      |
| Generic Names         | Candesartan<br>cilexetil/hydrochlorothiazide    |
| Generic Names         | Captopril/hydrochlorothiazide                   |
| Generic Names         | Chlorothiazide                                  |
| Generic Names         | Chlorthalidone                                  |
| Generic Names         | Chlorthalidone/clonidine hydrochloride          |
| Generic Names         | Dexamethasone                                   |
| Generic Names         | Dyphylline                                      |
| Generic Names         | Enalapril maleate/hydrochlorothiazide           |
| Generic Names         | Epinephrine                                     |
| Generic Names         | Eprosartan<br>mesylate/hydrochlorothiazide      |
| Generic Names         | Ethacrynic acid                                 |
| Generic Names         | Fluticasone propionate/salmeterol<br>xinafoate  |
| Generic Names         | Formoterol fumarate                             |
| Generic Names         | Fosinopril sodium/hydrochlorothiazide           |
| Generic Names         | Furosemide                                      |
| Generic Names         | Hydrochlorothiazide                             |
| Generic Names         | Hydrochlorothiazide/irbesartan                  |
| Generic Names         | Hydrochlorothiazide/lisinopril                  |
| Generic Names         | Hydrochlorothiazide/losartan<br>potassium       |
| Generic Names         | Hydrochlorothiazide/metoprolol                  |

|                    |                                               |
|--------------------|-----------------------------------------------|
|                    | succinate                                     |
| Generic Names      | Hydrochlorothiazide/metoprolol tartrate       |
| Generic Names      | Hydrochlorothiazide/moexipril hydrochloride   |
| Generic Names      | Hydrochlorothiazide/olmesartan medoxomil      |
| Generic Names      | Hydrochlorothiazide/propranolol hydrochloride |
| Generic Names      | Hydrochlorothiazide/quinapril hydrochloride   |
| Generic Names      | Hydrochlorothiazide/spironolactone            |
| Generic Names      | Hydrochlorothiazide/telmisartan               |
| Generic Names      | Hydrochlorothiazide/timolol maleate           |
| Generic Names      | Hydrochlorothiazide/triamterene               |
| Generic Names      | Hydrochlorothiazide/valsartan                 |
| Generic Names      | Hydroflumethiazide                            |
| Generic Names      | Indapamide                                    |
| Generic Names      | Ipratropium bromide                           |
| Generic Names      | Isoetharine                                   |
| Generic Names      | Isoproterenol                                 |
| Generic Names      | Levalbuterol                                  |
| Generic Names      | Metaproterenol sulfate                        |
| Generic Names      | Methyclothiazide                              |
| Generic Names      | Methylprednisolone                            |
| Generic Names      | Metolazone                                    |
| Generic Names      | Oxtriphylline                                 |
| Generic Names      | Pirbuterol acetate                            |
| Generic Names      | Polythiazide                                  |
| Generic Names      | Polythiazide/prazosin hydrochloride           |
| Generic Names      | Salmeterol xinafoate                          |
| Generic Names      | Spironolactone                                |
| Generic Names      | Terbutaline sulfate                           |
| Generic Names      | Theophylline                                  |
| Generic Names      | Torsemide                                     |
| Generic Names      | Triamterene                                   |
| Generic Names      | Trichlormethiazide                            |
| Revenue Codes      | 0277                                          |
| Revenue Codes      | 060x                                          |
| ICD-9-CM Diagnosis | V46.2x                                        |
| CPT                | 4030F                                         |
| HCPCS              | E0424-E0444                                   |
| HCPCS              | E0455                                         |

|                       |        |
|-----------------------|--------|
| HCPCS                 | E1353  |
| HCPCS                 | K0738  |
| HCPCS                 | E1390  |
| HCPCS                 | E1391  |
| ICD-9-CM<br>Diagnosis | 765.21 |
| ICD-9-CM<br>Diagnosis | 765.22 |
| ICD-9-CM<br>Diagnosis | 765.23 |
| ICD-9-CM<br>Diagnosis | 765.24 |
| ICD-9-CM<br>Diagnosis | 765.25 |
| ICD-9-CM<br>Diagnosis | 765.26 |
| ICD-9-CM<br>Diagnosis | 765.27 |
| ICD-9-CM<br>Diagnosis | 765.28 |
| ICD-9-CM<br>Diagnosis | 765.29 |
| ICD-9-CM<br>Diagnosis | 765.20 |
